# Supplementary material for: Water droplets bouncing on superhydrophobic soft porous materials
Source: Royal Society of Chemistry journal article supplement (doi:10.1039/c4ta02391a), 2014-01-01
Supplement: c4ta02391a2.pdf [file c4ta02391a2.pdf]

## Supporting Information

### Water droplet bouncing on superhydrophobic soft porous materials

*Yao Lu, Sanjayan Sathasivam, Jinlong Song, Wenji Xu, Claire J. Carmalt and Ivan P. Parkin\**

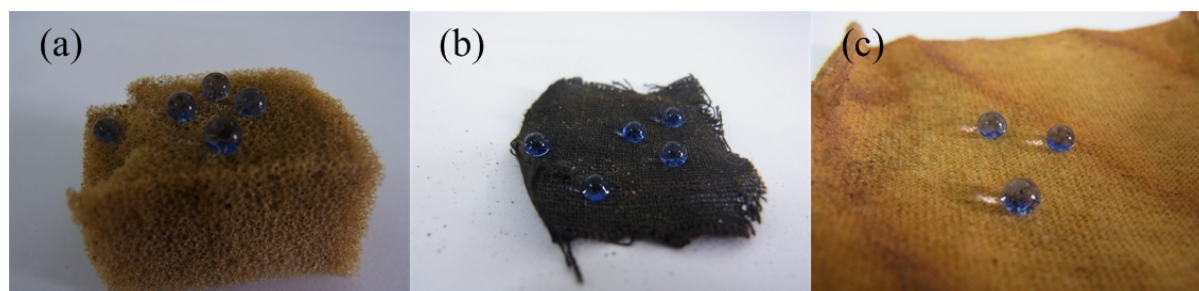

**Figure S1.** Images of superhydrophobic (a) sponge, (b) cloth A and (c) cloth B.

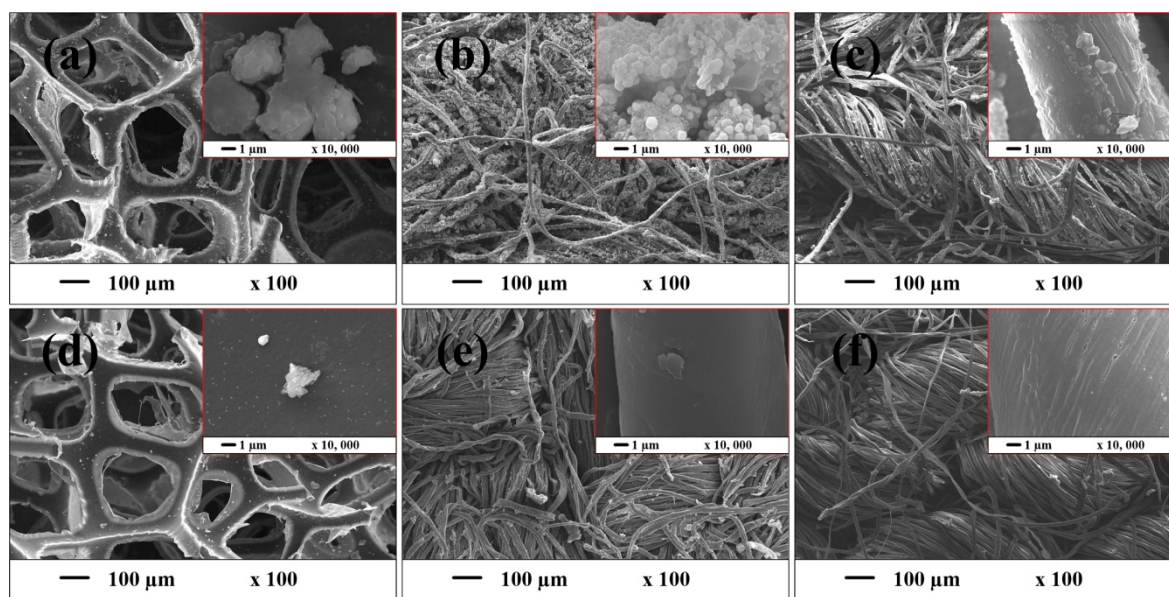

**Figure S2.** SEM images of superhydrophobic (a) sponge, (b) cloth A and (c) cloth B; and untreated (d) sponge, (e) cloth A and (f) cloth B. Inserts are in 10000X magnification.

**Movie 1.** Water bouncing on superhydrophobic cotton and scouring pad.
